# Supplementary material
Source: PubMed Central journal article supplement (PMC10528757)
Supplement: NIHMS1925610-supplement-2.pdf [file NIHMS1925610-supplement-2.pdf]

**Figure S1 Extended validation of TRPPC system and expanded utility to other viral systems, related to Figure 1.**

**A,** TRPPCa in A549-CRISPRa cells of a luciferase reporter targeted by sgRNA expressed from transfected *NS* in the presence of the viral replication machinery. *Split NS* that lacks an sgRNA is included as a control.

**B,** TRPPCa functions with *NS* from primary isolates of IAV and IBV. Activation of a luciferase reporter targeted by sgRNA expressed from transfected CA07 or IBV *TRPPC-NS* in the presence of matched viral polymerase and NP.

**C,** TRPPC-inhibition (TRPPCi) suppresses gene expression. PR8 *TRPPC-NS* suppressed reporter gene expression when transfected into cells with the viral polymerase, NP, and dCas9-KRAB.

**D,** Example plaque morphologies for WT and engineered viruses.

**E,** TRPPC viruses replicate similar to WT in multiple cell lines. Multicycle replication kinetics of WT, split-NS, or TRPPCa-NS with a non-targeting sgRNA in MDCK and A549-CRISPRa cells (MOI = 0.01).

**F,** Engineered *NS* segment stability was measured over serial passages by assessing amplicon sizes by RT-PCR.

**G,** TRPPC targeting does not affect replication in cells lacking the CRISPRa machinery. Multicycle replication of TRPPC viruses targeting specified host genes in WT A549 cells inoculated at MOI = 0.01.

**H,** Diagram of genome engineering where ribozymes are used to process sgRNAs from the influenza virus genome (left) or a U6 promoter is used to express sgRNAs from the adenovirus genome (right).

**I,** TRPPCa of a luciferase reporter in 293T-CRISPRa cells. Cells were transfected with vectors expressing viral genomic RNA *Split NS* that lacks an sgRNA, or *TRPPC Rz NS* targeting the reporter promoter.

**J,** Adenovirus TRPPCa: TRPPC activation of a luciferase reporter in 293T-CRISPRa cells transfected with an adenoviral subgenomic plasmid expressing an sgRNA targeting the reporter promoter (left) or infected with a virus expressing an sgRNA. Data are normalized to WT controls.

**K,** Adenovirus TRPPCi: TRPPC inhibition of a luciferase reporter in 293T expressing dCas9-KRAB-MeCP2, VP16-Gal4, and the UAS-Nluc-PEST reporter transfected with a adenoviral subgenomic plasmid (left) or infected with adenovirus (right) expressing an sgRNA targeting the UAS. Data are normalized to WT controls.

**L**, Replication of TRPPCa and TRPCCi viruses. A549 cells were infected with WT or sgRNA-expressing viruses (MOI = 5), samples were collected at the indicated times, and titered by plaque assay.

Data are shown as grand mean of 3 replicates  $\pm$  SEM (C, D, F, J-L) mean  $\pm$  s.d. (E, G, I). Unpaired T tests (C, D, F, I, J, K) or one-way ANOVA with post-hoc Dunnett's tests (E, G, J-L) were performed (\* $p < 0.05$ , \*\* $p < 0.01$ , \*\*\* $p < 0.001$ , \*\*\*\* $p < 0.0001$ ).

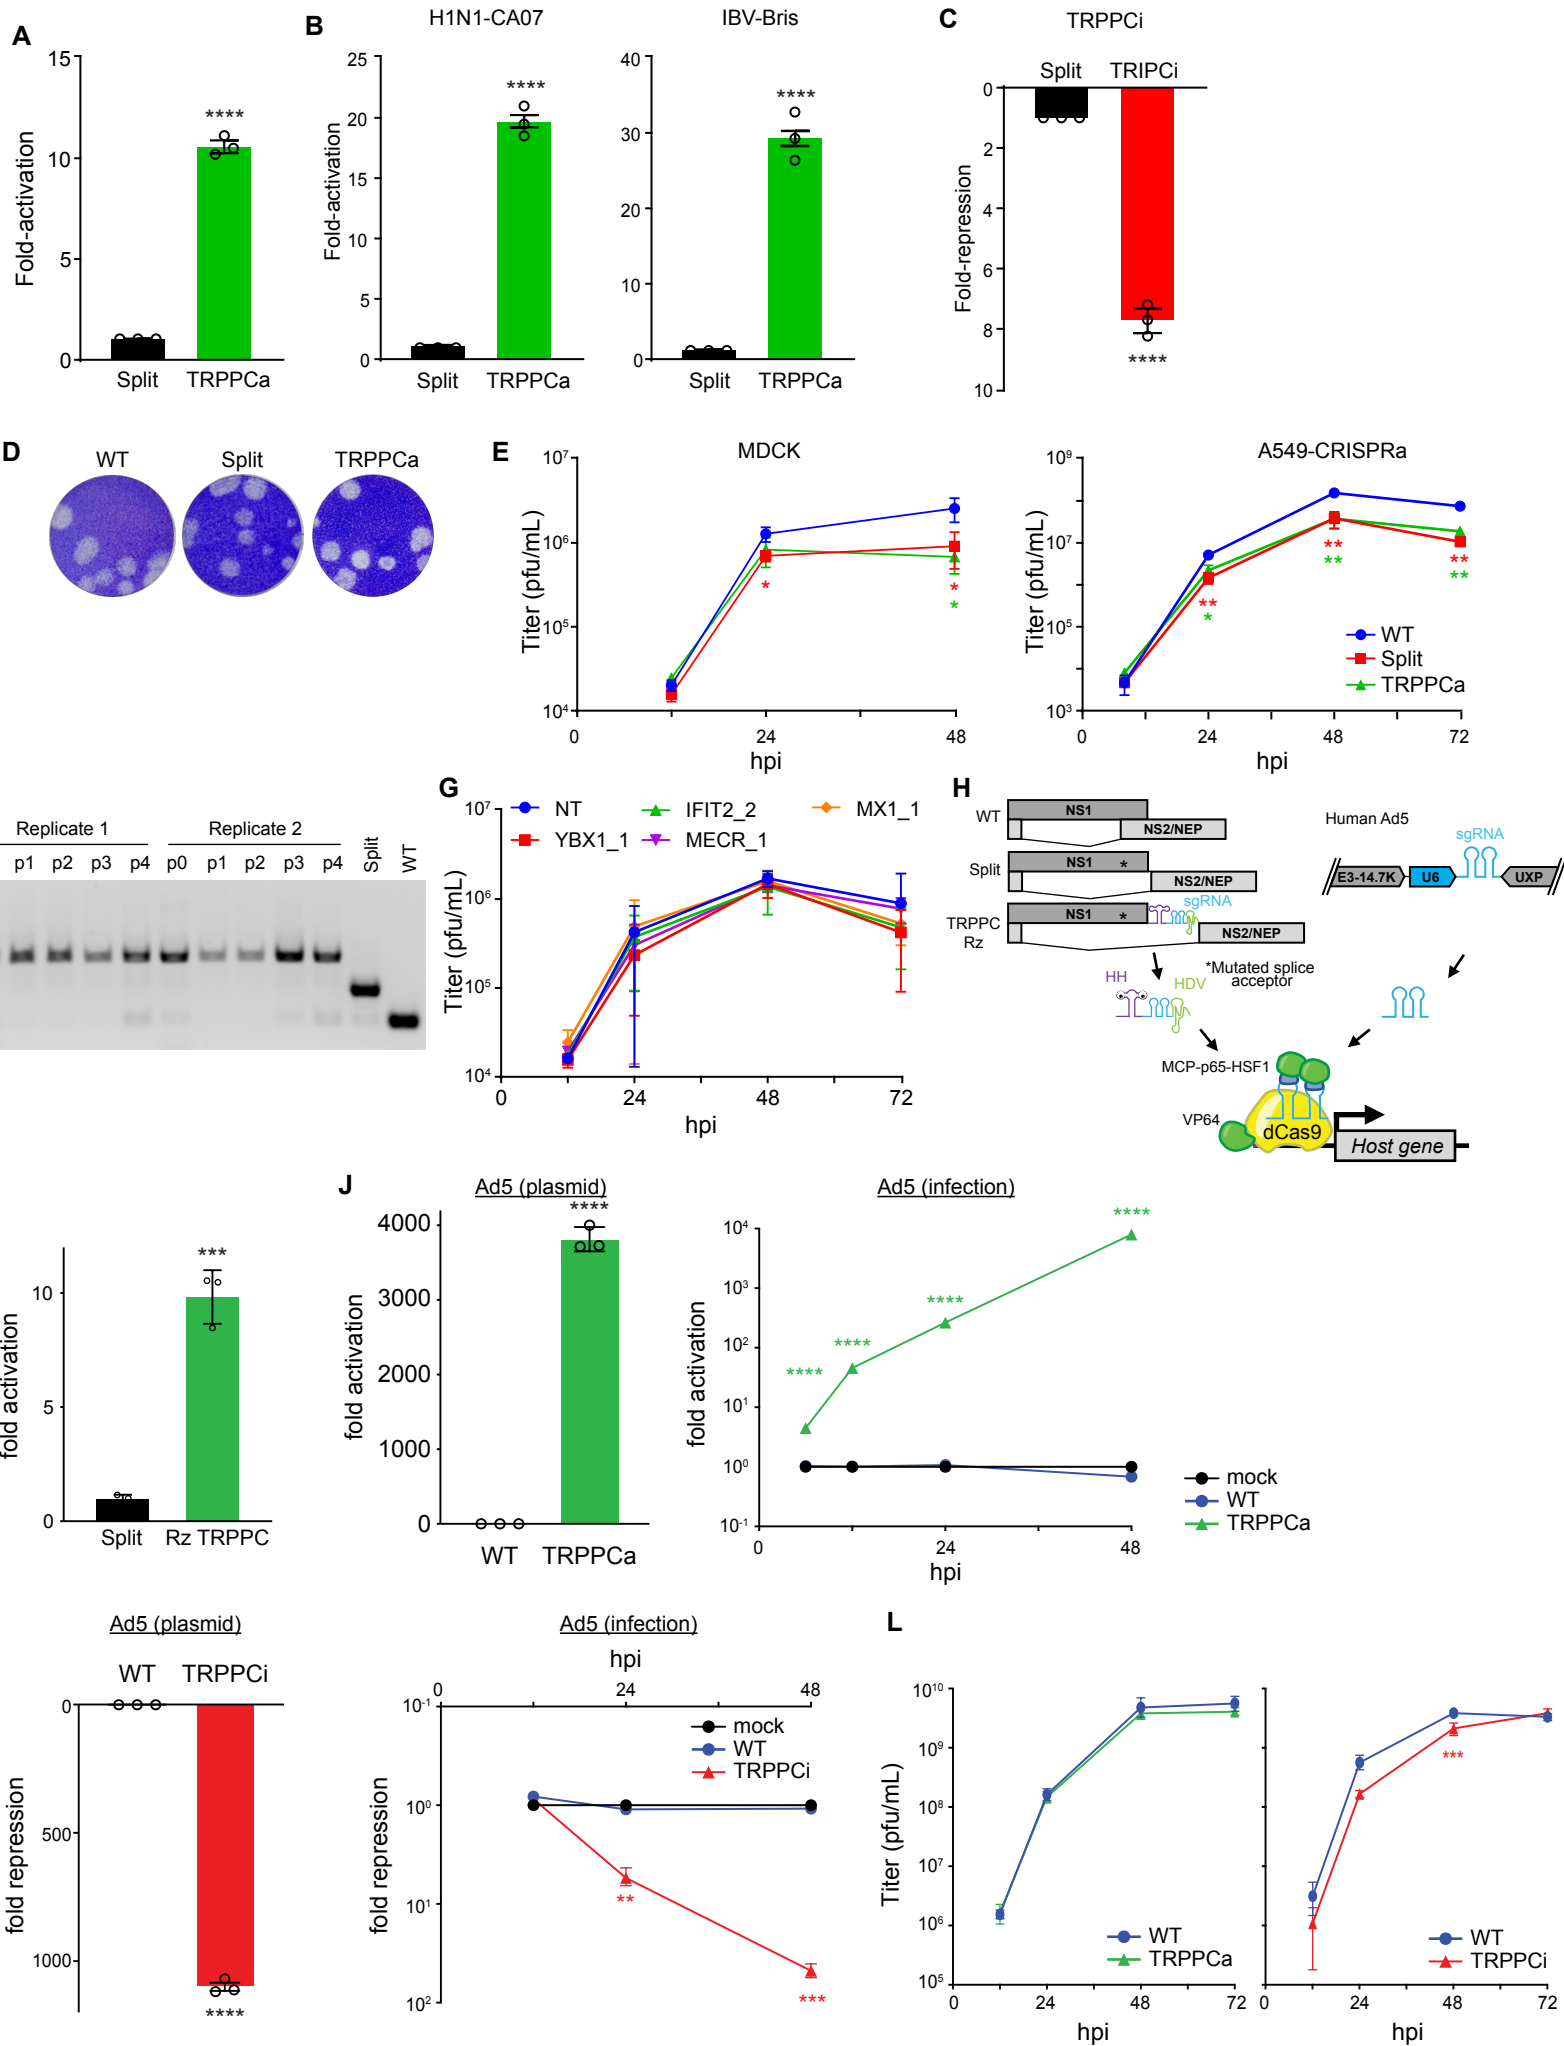

**Figure S2 Characterization of TRPPC library and gene enrichment analysis, related to Figure 2.**

**A,** Experimental workflow for the creation of a genome-wide TRPPC virus library.

**B,** Distribution histogram and cumulative frequency plot of each member in the TRPPC virus library stock prior to selection.

**C,** Cumulative frequency plot of each member in the three replicate screens after the fifth passage. Only sgRNAs detected at least once are included in the analysis.

**D,** Shannon's diversity indices ( $H'$ ) and richness of the viral populations at each passage during the 3 TRPPC screens.

**E,** GO analysis highlighting the molecular function pathways enriched among the top 100 selected genes based on MAGeCK scores.

**F,** Groupings of high-level gene functions conferred by the top 100 genes.

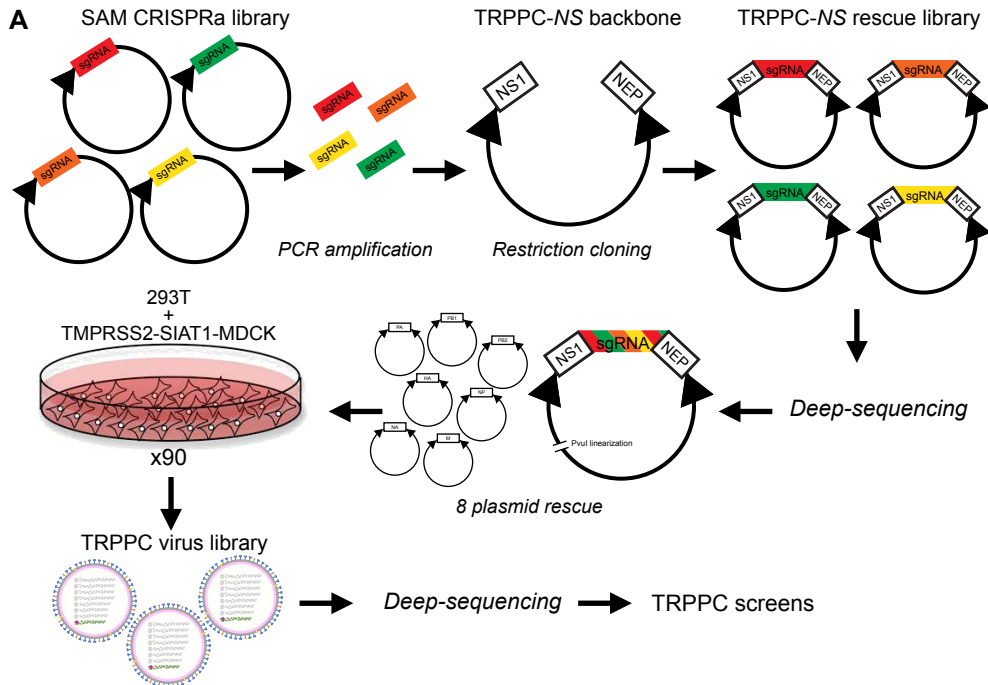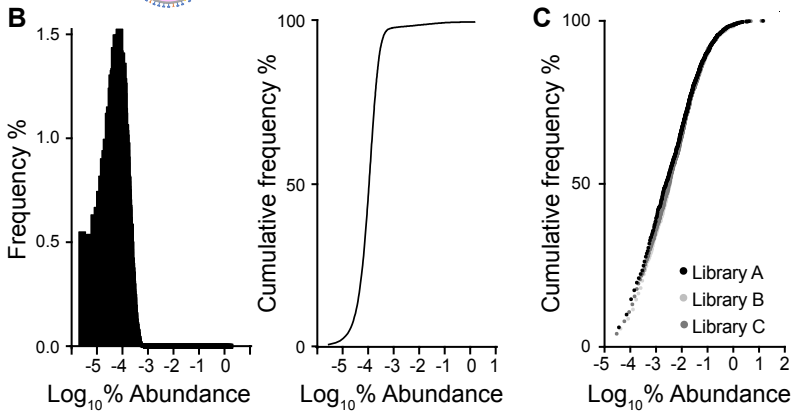

**D**

**virus**  
Shannon Diversity (H')

| plasmid  | p0       | p1       | p2       | p3       | p4       | p5       |
|----------|----------|----------|----------|----------|----------|----------|
| 10.90131 | 6.506059 | 5.682367 | 5.282353 | 5.192416 | 5.068081 | 4.850333 |
|          | 6.506059 | 5.678302 | 5.305056 | 5.20663  | 5.122207 | 4.955211 |
|          | 6.506059 | 5.646149 | 5.202897 | 5.077303 | 4.987117 | 4.769359 |

**richness**

|       | p0    | p1   | p2   | p3   | p4   | p5   |
|-------|-------|------|------|------|------|------|
| 69179 | 69276 | 3742 | 1993 | 1768 | 1652 | 1565 |
|       | 69276 | 3656 | 1989 | 1750 | 1629 | 1555 |
|       | 69276 | 3512 | 1880 | 1661 | 1536 | 1419 |

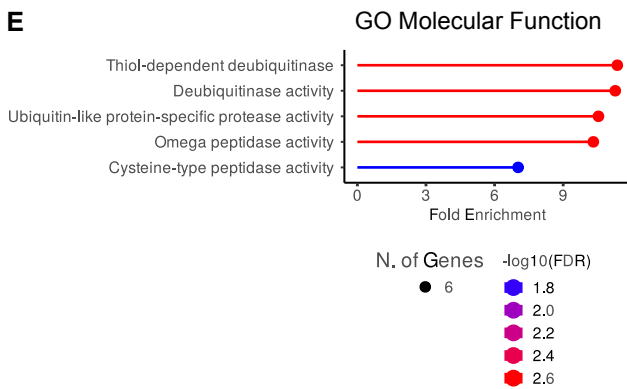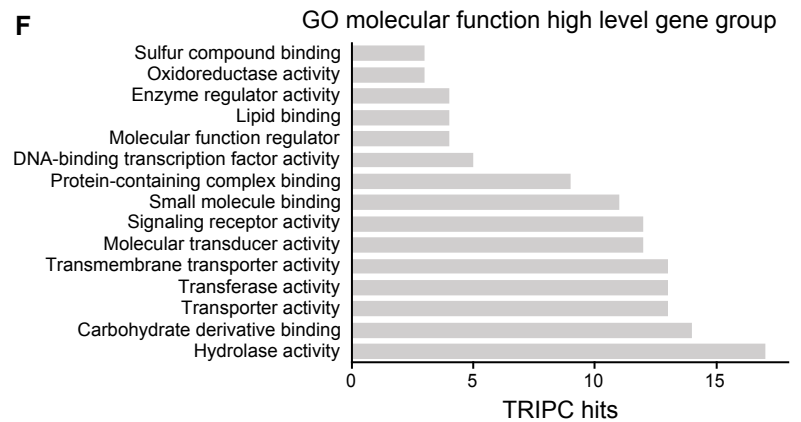

**Figure S3 Further validation of TREX1 as a proviral host factor, related to Figure 3.**

**A,** TREX1 expression was measured in WT A549 inoculated with *TREX1*-targeting or non-targeting control TRPPC viruses (MOI = 1) by RT-qPCR (top) and western blot (bottom).

**B,** Multicycle replication of *TREX1*- or non-targeting TRPPC viruses in WT A549 cells (MOI = 0.01). Titers determined by plaque assay.

**C,** Multicycle replication of a WSN influenza A reporter virus (MOI = 0.05) in A549 cells transfected with GFP-tagged TREX1, TREX1<sup>D18N</sup> or a GFP-alone control.

**D,** Multicycle replication of a WSN influenza A reporter virus (MOI = 0.05) in A549 cells expressing GFP-tagged TREX1, TREX1<sup>D18N</sup> or a GFP-alone control.

**E,** *TREX1* genotype of knockout cells. Sanger sequencing traces display CRISPR-Cas9 editing at the *TREX1* locus for 3 selected knockout clones. Edits compared to the WT genome are shown for 2 homozygous (B6, C8) and 1 heterozygous (G11) clones.

**F,** TREX1 knockout was confirmed by western blotting lysates from WT, clonal KO, and complemented A549 cell lines. Endogenous TREX1 and recombinant TREX1-V5-2A are indicated. \* = non-specific bands. These cells lines are used throughout Fig 3-6.

Data are shown as grand mean of 3 replicates  $\pm$  SEM (C-D) or mean  $\pm$  s.d. (A-B). Unpaired T tests (D) or one-way ANOVA with post-hoc Dunnett's tests (A, C) were performed (\* $p$ <0.05, \*\* $p$ <0.01, \*\*\* $p$ <0.001, \*\*\*\* $p$ <0.0001, ns = not significant).

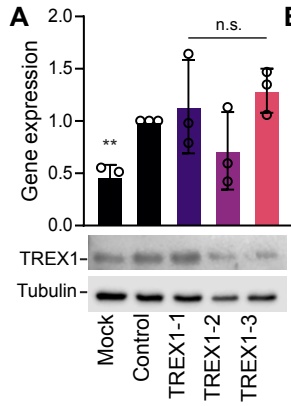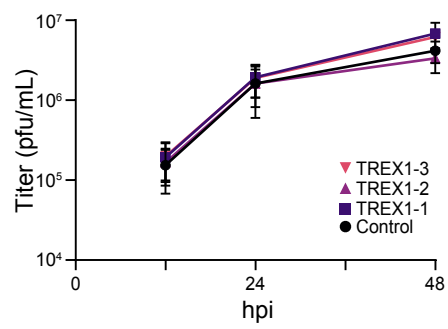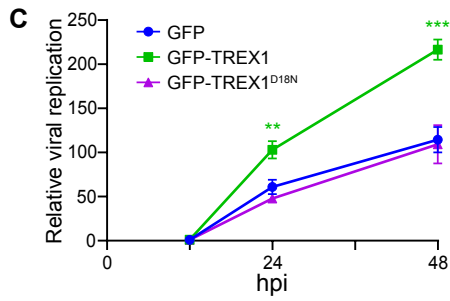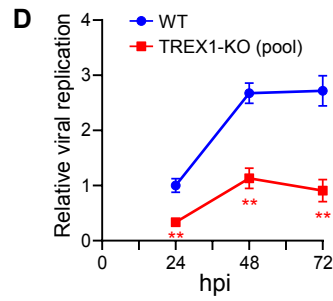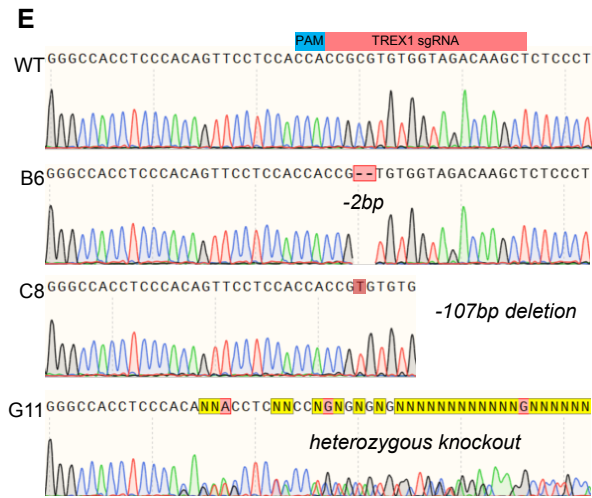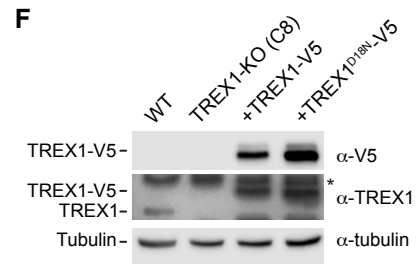

**Figure S4 Reporter cell line validation and IAV replication in MAVS-knockout, related to Figure 4.**

**A-B**, IFN signaling and RNA sensing remain intact in TREX1-KO cells. ISRE induction in WT and TREX1-KO reporter cells treated with a) IFN $\beta$  or b) transfected with poly(I:C). ISRE activation is normalized to untreated and mock-transfected cells, respectively.

**C**, Sensing of foreign nucleic acids blocks IAV replication. Replication of influenza A virus (MOI = 0.05) in WT A549 cells treated with the indicated nucleic acid ligands.

**D**, Western blotting demonstrates STING expression in our lineage of A549 cells in both mock and influenza virus-infected conditions.

**E**, Infection in cells lacking RNA sensing for comparison. Multicycle replication of influenza A virus (MOI = 0.05) in WT and MAVS-KO A549 cells.

Data are shown as grand mean of 3 replicates  $\pm$  SEM. Significance was tested with a two-way ANOVA with Šídák's multiple comparisons (A-B) or a one-way ANOVA with post-hoc Dunnett's test (\*\* $p < 0.01$ , \*\*\* $p < 0.001$ , \*\*\*\* $p < 0.0001$ , ns = not significant).



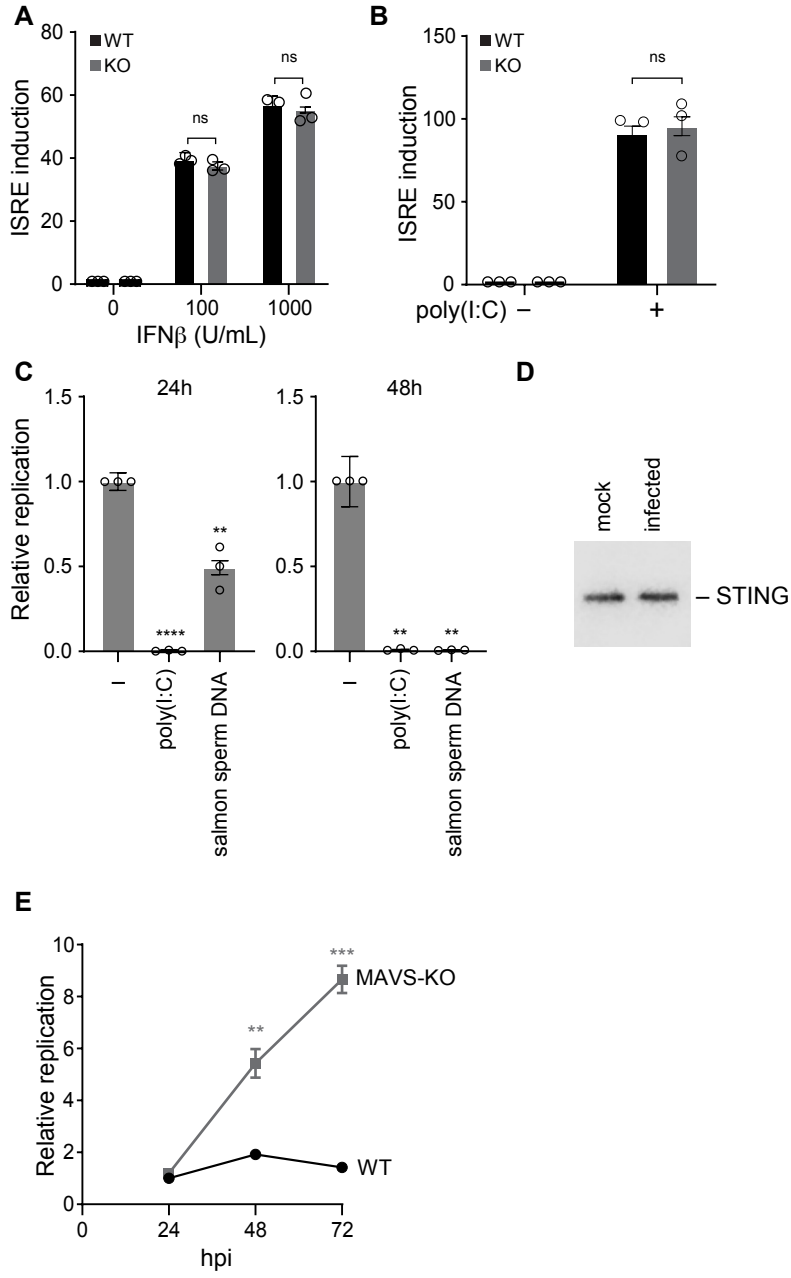

**Figure S5 Cytoplasmic DNA puncta and ISRE induction by untreated cytosolic extracts, related to Figure 5. A,** Mean intensity of cytoplasmic puncta identified by staining for dsDNA were quantified at 0 hpi (left) and 6 hpi (right) for WT, TREX1-knockout (KO), or complemented cells (+TREX1) inoculated with influenza A virus. Representative micrographs for these experiments are in Fig 5A. Individual data points and mean are shown and analyzed by a one-way ANOVA with post-hoc Dunnett's tests (\*\* $p < 0.001$ , \*\*\*\* $p < 0.0001$ ).

**B,** ISRE induction was measured in WT and TREX1-KO reporter cells transfected with untreated cytosolic extracts derived from mock or infected cells. Bioluminescence values are normalized to untransfected cells.

Data are shown as grand mean of 3 replicates  $\pm$  SEM.

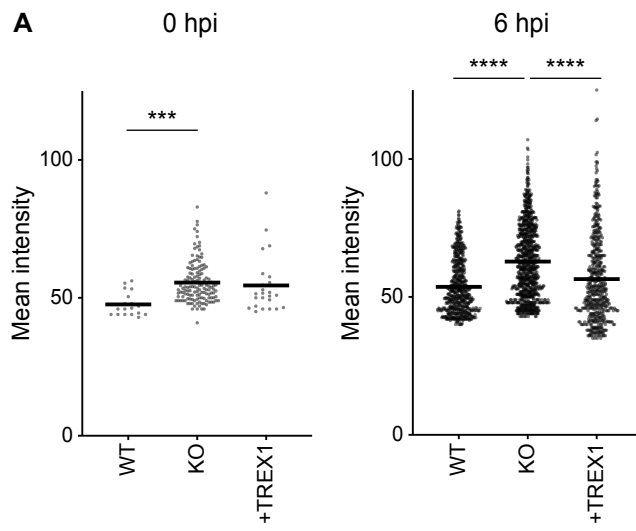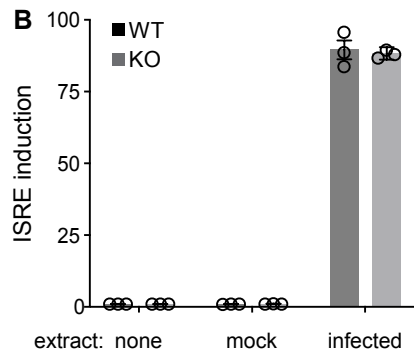

**Figure S6 TREX1 modulates host gene expression but does not alter viral polymerase activity, related to Figure 6.**

**A,** Influenza polymerase activity was measured in a mini-replicon assay in the presence of exogenous GFP-TREX1 or vector control. Data are shown as means of 3 replicates  $\pm$  SEM. Pairwise T-tests tests were performed (ns = not significant).

**B-C,** Loss of TREX1 amplifies innate immune responses. **B,** Gene enrichment analysis of all host genes upregulated >4-fold during infection in TREX1-KO or complemented cells compared to their matched mock-treated cells. GO biological processes are shown. Enrichment FDR  $<10^{-7}$  for all biological categories. **C,** Gene enrichment analysis of ISGs plotted in Fig 6F. This includes only ISGs induced  $\geq 2$ -fold during infection in TREX1 KO cells whose induction levels change by at least 50% different between cell lines. Significantly enriched biological processes are shown along with their enrichment values.

**D,** TREX1-KO cells exhibit a chronic inflammatory state. Genes differentially expressed at least 4-fold between uninfected TREX1-KO and complemented cells were subject to gene enrichment analysis. Significantly enriched biological processes are shown along with their enrichment values.

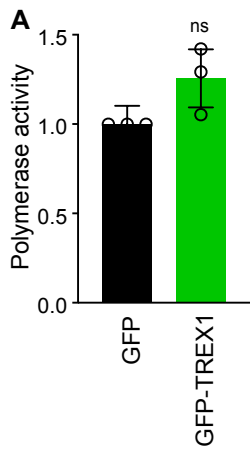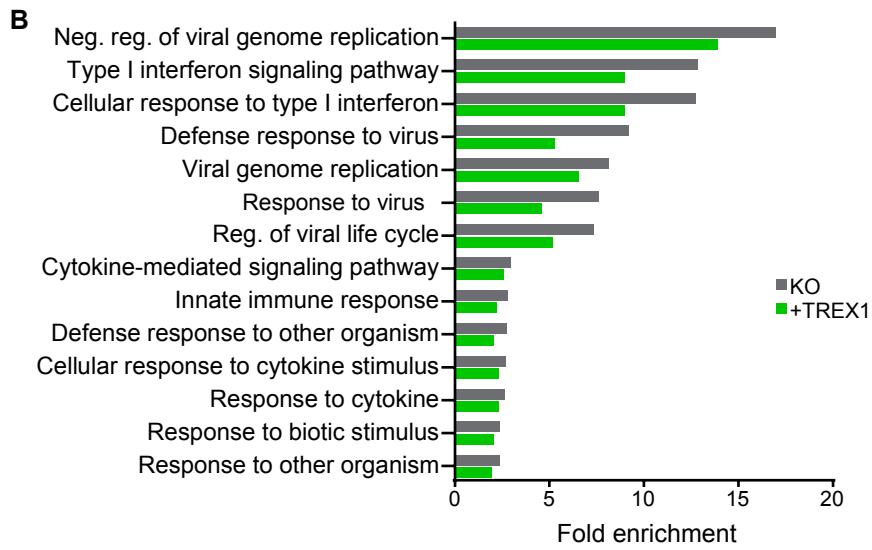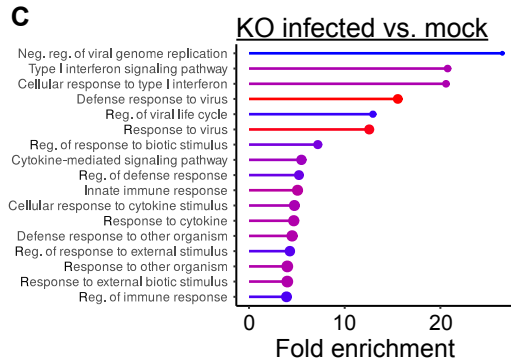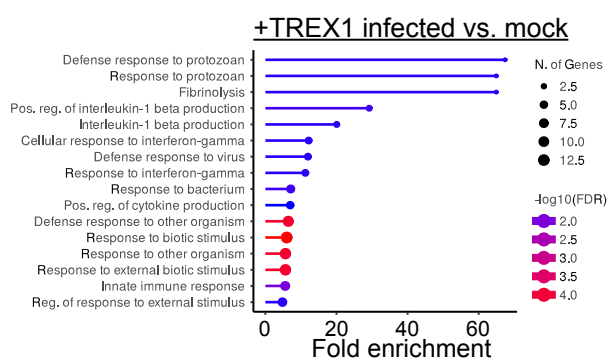

**D** KO baseline

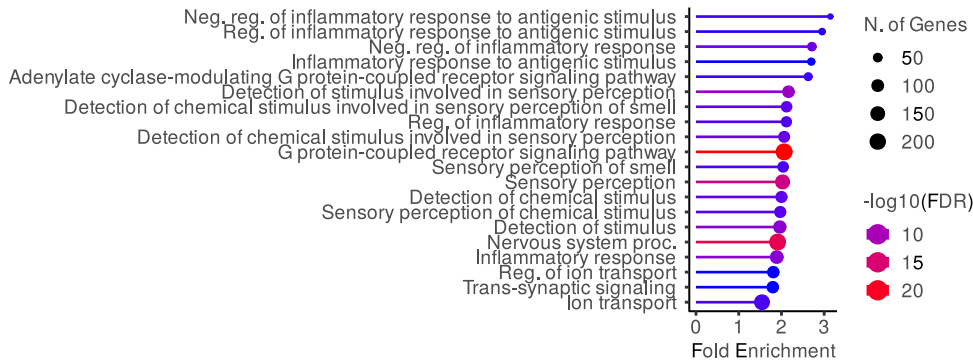

+TREX1 baseline

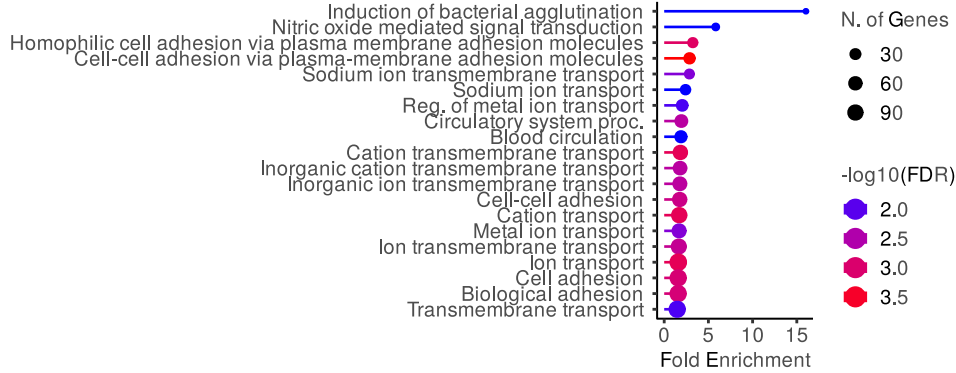

**Methods S1 Sequence of TRPPC cassettes, related to Figure 1 and Figure S1**



Ad5 TRPPCi-CH (in pAd5-B6)

E3 (14.7K)

U6 promoter

sgRNA target sequence in UAS-Nluc-PEST

tracr-v2 backbone and U6 terminator

UXP ORF fragment (antisense)

ATGACTGACACCCTAGATCTAGAAATGGACGGAATTATTACAGAGCAGCGCCTGCTAGAAAGACGCAGGG  
CAGCGGCCGAGCAACAGCGCATGAATCAAGAGCTCCAAGACATGGTTAACTTGCACCAGTGCAAAAGGG  
GTATCTTTTGTCTGGTAAAGCAGGCCAAAGTCACCTACGACAGTAATACCACCGGACACCGCCTTAGCTA  
CAAGTTGCCAACCAAGCGTCAGAAATTGGTGGTCATGGTGGGAGAAAAGCCCATTACCATAACTCAGCAC  
TCGGTAGAAACCGAAGGCTGCATTCACTCACCTTGTCAAGGACCTGAGGATCTCTGCACCCTTATTAAGA  
CCCTGTGCGGTCTCAAAGATCTTATTCCCTTAACTAATAAAAAAAAAATAAgagggcctattccatgattcctcatattg  
catatacgatacaaggctgttagagagataattggaataattgactgtaaacacaaagatattagtaaaaatacgtgacgtagaaagtaataattcttg  
gtagttgcagtttaaaattatgtttaaaatggactatcatatgctaccgtaactgaaagtattcgtattcttgctttatatactgtggaaaggacgaaacac  
ctacctcatcaggaacatgtGTTTCAGAGCTACAGCAGAAATGCTGTAGCAAGTTGAAATAAGGCTAGTCCGTTATC  
AACTTGAAAAGTGGCACCGAGTCGGTGCTTTTTTTTTAAAGCATCACTTACTTAAAATCAGTTAGCAAATT  
TCTGTCCAGTTTATTAGCA

### PR8 TRPPC NS Rz (plus-sense)

Genomic sequence of the engineered NS segment where sgRNAs are flanked by ribozymes.

UTR

NS1

mutant splice acceptor

hammerhead ribozyme (complimentary sequence, approximate cleavage site 3' of **bold** nt) (PMID 27606350)

sgRNA 2.0 (PMID 25494202)

Shechner sgRNA target sequence (PMID 26030444)

MS2 hairpins

HDV ribozyme (approximate cleavage site 3' of **bold** nt) (PMID 27606350)

NEP (5' exon in NS1 coding sequence)

UTR

agcaaaagcaggggtgacaaaaacataatggatccaaacactgtgtcaagctttcaggtagattgctttctttggcatgtccgcaaacga  
ggttcagaccaagaactaggcgatgccccattccttgatcggcttcgccgagatcagaaatccctaagaggaaggggcagtaactctcgg  
tctggacatcaagacagccacacgtgctggaagcagatagtgagcggattctgaaagaagaatccgatgaggcacttaaaatgacca  
tggcctctgtacctgctgctgcttacctaactgacatgactcttgaggaaatgtcaagggactggtccatgctcatacccaagcagaaa  
gtggcagggcctctttgtatcagaatggaccagggcgatcatggataagaacatcatactgaaagcgaacttcagtgatgtttttgaccg  
gctggagactctaataattgctaagggctttcaccgaagagggagcaattggtggcgaatctcaccattgccttctctc**ccggg**acata  
ctgctgaggatgtcaaaaatgcagttggagtcctcatcggaggacttgaatggaatgataacacagttcagagtcctctgaaactctacag  
agattcgttgagagaagcagtaaatgagaatgggagacctccactcactccaaaacagaaaacgagaaatggcggggaacaattaggtcaga  
agtttgaggtaccGCGATCGCCTGGCCCTGATGAGTCCGTGAGGACGAAACGGTAGGAATTCCTACCGTCGGCCAgATCTAGATACGAC  
TCACTATGTTTTAGAGCTAGGCCAACATGAGGATCACCCATGTCTGCAGGGCCTAGCAAGTTAAAATAAGGCTAGTCCGTTATCAACTT  
GGCCAACATGAGGATCACCCATGTCTGCAGGGCCAAGTGGCACCGAGTCGGTGCTTTTTTgcggcctcgagGGCCGGCATGGTCCCAGCC  
TCCTCGCTGGCGCCGGCTGGGCAACATTCCGAGGGGACCGTCCCCTCGGTAATGGCGAATGGGACTATCgcggcgcgcatcaccattgc  
cttctctccaggacatactgctgaggatgtcaaaaatgcagttggagtcctcatcggaggacttgaatggaatgataacacagttcga  
gtctctgaaactctacagagattcgttgagagaagcagtaaatgagaatgggagacctccactcactccaaaacagaaaacgagaaatggc  
gggaacaattaggtcagaagtttgaagaaataagatggttgattgaagaagtgagacacaaactgaagataacagagaatagttttgag  
caataacatttatgcaagccttacatctattgcttgaagtggagcaagagataagaactttctcgtttcagcttatttagtactaaaa  
aacacccttgtttctact
